# Supplementary material for: Using Organoids to Model Sex Differences in the Human Brain
Source: PubMed Central journal article supplement (PMC11292257; doi:10.1016/j.bpsgos.2024.100343), 2024-06-04
Supplement: mmc1.pdf [file mmc1.pdf]

# **SUPPLEMENTARY INFORMATION**

## **Using Organoids to Model Sex Differences in the Human Brain**

Pavlinek *et al.*

**Supplementary table 1: Table of steroid effects on synapses – selected studies**

| <b>Hormone/Compound</b> | <b>Effects of treatment on synapse parameter (treatment timeframe)</b>                                                                                                           | <b>Species and age (Model)</b>                                                  | <b>Reference</b> |
|-------------------------|----------------------------------------------------------------------------------------------------------------------------------------------------------------------------------|---------------------------------------------------------------------------------|------------------|
| 17 $\beta$ -estradiol   | Increased excitatory postsynaptic amplitude and LTP amplitude (acute)                                                                                                            | Rat pups* (hippocampal slices); adult and aged male rats (hippocampal slices)   | (1, 2)           |
|                         | Induced NMDA-independent LTP (acute)                                                                                                                                             | Young male rats (hippocampal slices)                                            | (3)              |
|                         | Enhanced induction of LTP, increased the density of parallel fiber to Purkinje cell synapses (14 days)                                                                           | Ovariectomized female and male adult mice (cerebellar slices)                   | (4)              |
|                         | Increased field excitatory postsynaptic potentials (acute), increased LTP                                                                                                        | Young male and female rats and mice (hippocampal slices)                        | (5)              |
|                         | Enhanced LTP, increased field excitatory postsynaptic potentials (acute)                                                                                                         | Young male rats (hippocampal slices)                                            | (6)              |
|                         | Enhanced synaptic response to stimulation of the vestibular nerve, but reduces spontaneous discharge in A and B neurons; enhanced excitatory post-synaptic potential and current | Male rats (medial vestibular nucleus brainstem slices)                          | (7)              |
|                         | Induced LTP, increased density of small spines (acute)                                                                                                                           | Adult male rat (hippocampal slices)                                             | (8)              |
|                         | Decreased inhibitory postsynaptic currents and suppressed GABA release in females only                                                                                           | Adult ovariectomized female and male rats (hippocampal slices)                  | (9)              |
|                         | Increased field excitatory postsynaptic potentials (acute)                                                                                                                       | adult male rats (hippocampal slices);                                           | (10, 11)         |
|                         | Increased fast glutamatergic transmission, increased number of actin spines, facilitated LTP                                                                                     | Young male rats and ovariectomized middle-aged female rats (hippocampal slices) | (12)             |
|                         | Increased excitatory postsynaptic potentials (45 minutes)                                                                                                                        | Male and female mice (hippocampal slices)                                       | (13)             |
|                         | 17 $\beta$ -estradiol treatment rescued aromatase knockout-associated deficits: increased LTP amplitude, increased synaptophysin and PSD95 protein levels (7 days)               | Female mice                                                                     | (14)             |
|                         | Reduced glutamate decarboxylase in interneurons, reduced miniature inhibitory postsynaptic currents (24 hrs)                                                                     | Embryonic rat* (primary culture containing hippocampal interneurons)            | (15)             |

|                                 |                                                                                                                                                                             |                                                                                                 |          |
|---------------------------------|-----------------------------------------------------------------------------------------------------------------------------------------------------------------------------|-------------------------------------------------------------------------------------------------|----------|
|                                 | Increased excitatory postsynaptic currents, increased miniature excitatory postsynaptic currents, enhanced oscillation of glutamate-induced calcium                         | Young male and female rats (hippocampal slices)                                                 | (16)     |
|                                 | Increased dendritic spine density and increased synaptic surface AMPAR content, increased GluN2A-NMDAR and decreasing GluN2B-NMDAR synaptic content (24 hrs)                | Rat embryos* (primary neural culture), male mice                                                | (17)     |
|                                 | Increased expression of PSD-95, increased spine density                                                                                                                     | Male and female rats (hippocampal slices and primary neural cultures)                           | (18)     |
|                                 | Increased spine density, formation of silent synapses (acute)                                                                                                               | Embryonic rat* (cortical neuronal cultures)                                                     | (19)     |
|                                 | Increased synaptic excitability (48hrs), increased excitatory postsynaptic potentials and potentiation of responses to AMPA, kainate, and quisqualate, but not NMDA (acute) | Ovariectomized adult female rats (hippocampal slices)                                           | (20)     |
|                                 | Increased field excitatory postsynaptic potentials, increased membrane levels of GluR1 (acute)                                                                              | Embryonic rats* and mice* (cultured cortical and hippocampal neurons, acute hippocampal slices) | (21)     |
|                                 | Enhanced release of dopamine                                                                                                                                                | Ovariectomized female rats (dorsolateral striatum)                                              | (22)     |
| Aromatase inhibitor (Letrozole) | Prevented LTP at fiber–Purkinje cell synapses (acute)                                                                                                                       | Adult male rats (cerebellar slices)                                                             | (23)     |
|                                 | Reduced basolateral amygdala spine synapse density in female mice only (7 days), prevented LTP induction in females only (60 minutes)                                       | Male and female mice, male and female neonatal rats (corticoamygdalar slices)                   | (24)     |
| Dihydrotestosterone             | Increased spine synapse density (2 days)                                                                                                                                    | ovariectomized adult female rats (hippocampus)                                                  | (25)     |
| Estradiol benzoate              | Increased field excitatory postsynaptic potentials (acute)                                                                                                                  | Adult ovariectomized female rats (hippocampal slices)                                           | (26)     |
| Flutamide (AR blocker)          | Prevented LTD, No effect on LTP (acute)                                                                                                                                     | Male rats (brainstem slices); Young and adult male rats (hippocampal slices)                    | (27, 28) |
| ICI 182,780 (ER blocker)        | Prevented LTP, No effect on LTD                                                                                                                                             | Male rats (brainstem slices); Young and adult                                                   | (27, 28) |

|                                                                      |                                                                              |                                                         |      |
|----------------------------------------------------------------------|------------------------------------------------------------------------------|---------------------------------------------------------|------|
|                                                                      |                                                                              | male rats<br>(hippocampal<br>slices)                    |      |
| MPP (ER $\alpha$<br>Antagonist) and ER $\beta$<br>Antagonist (PHTPP) | Reduced LTP amplitude, in<br>combination prevented LTP<br>completely (acute) | Young and adult<br>male rats<br>(hippocampal<br>slices) | (28) |
| PPT (ER $\alpha$ agonist)                                            | Induced LTP, increased GluA1<br>surface staining (acute)                     | Cultured<br>hippocampal<br>neonatal male rat<br>neurons | (3)  |

LTP - long-term potentiation

LTD - long-term depression

\* sex not reported/not considered

acute treatment - <1 hour

effects on synapses – effects on electrophysiological parameters, synaptic proteins, synaptic puncta and spines

**Supplementary table 2:** Table of brain-region specific organoids

| <b>Organoid type</b> | <b>Advantages</b>                                                                                                                                                                                                                                                                                                                                                                                       | <b>Reference</b> |
|----------------------|---------------------------------------------------------------------------------------------------------------------------------------------------------------------------------------------------------------------------------------------------------------------------------------------------------------------------------------------------------------------------------------------------------|------------------|
| Cortical spheroid    | Dorsal or ventral forebrain spheroids that can be assembled <i>in vitro</i> to recapitulate fetal migration of interneurons and their functional integration with glutamatergic neurons. This model of cortical development follows a targeted approach that specifically studies interaction of excitatory and inhibitory neurons, and can provide a better understanding of E-I imbalance mechanisms. | (29)             |
| Hippocampal organoid | Recapitulates hippocampus development, a key brain region influenced by sex steroids. Generates hippocampal granule-like, pyramidal-like neurons, and astrocyte-like cells.                                                                                                                                                                                                                             | (30)             |
| Cerebellar organoid  | Recapitulates early cerebellar development, the cerebellum being a non-cortical brain region showing sex-specific development. Generates precursors of cerebellar neurons (Purkinje-like, Golgi-like, DCN projection-like neurons, granule-like cells) with relevant morphology and electrophysiological properties.                                                                                    | (31)             |

## References

1. Bi R, Broutman G, Foy MR, Thompson RF, Baudry M (2000): The tyrosine kinase and mitogen-activated protein kinase pathways mediate multiple effects of estrogen in hippocampus. *Proc Natl Acad Sci U S A*. 97:3602-3607.
2. Foy MR, Baudry M, Foy JG, Thompson RF (2008): 17beta-estradiol modifies stress-induced and age-related changes in hippocampal synaptic plasticity. *Behav Neurosci*. 122:301-309.
3. Clements L, Harvey J (2020): Activation of oestrogen receptor  $\alpha$  induces a novel form of LTP at hippocampal temporoammonic-CA1 synapses. *British Journal of Pharmacology*. 177:642-655.
4. Corina EA, Bogdan AM, Elize DH, Piet K, Frank HDJ, Andrée K, et al. (2007): Estradiol Improves Cerebellar Memory Formation by Activating Estrogen Receptor  $\beta$ . *The Journal of Neuroscience*. 27:10832.
5. Di Mauro M, Tozzi A, Calabresi P, Pettorossi V, Grassi S (2015): Neo-synthesis of estrogenic or androgenic neurosteroids determine whether long-term potentiation or depression is induced in hippocampus of male rat. *Frontiers in Cellular Neuroscience*. 9.
6. Foy MR, Xu J, Xie X, Brinton RD, Thompson RF, Berger TW (1999): 17 $\beta$ -Estradiol Enhances NMDA Receptor-Mediated EPSPs and Long-Term Potentiation. *Journal of Neurophysiology*. 81:925-929.
7. Grassi S, Frondaroli A, Scarduzio M, Dutia MB, Dieni C, Pettorossi VE (2010): Effects of 17B-estradiol on glutamate synaptic transmission and neuronal excitability in the rat medial vestibular nuclei. *Neuroscience*. 165:1100-1114.
8. Hasegawa Y, Hojo Y, Kojima H, Ikeda M, Hotta K, Sato R, et al. (2015): Estradiol rapidly modulates synaptic plasticity of hippocampal neurons: Involvement of kinase networks. *Brain Research*. 1621:147-161.
9. Huang Guang Z, Woolley Catherine S (2012): Estradiol Acutely Suppresses Inhibition in the Hippocampus through a Sex-Specific Endocannabinoid and mGluR-Dependent Mechanism. *Neuron*. 74:801-808.
10. Wang W, Kantorovich S, Babayan AH, Hou B, Gall CM, Lynch G (2016): Estrogen's Effects on Excitatory Synaptic Transmission Entail Integrin and TrkB Transactivation and Depend Upon  $\beta$ 1-integrin function. *Neuropsychopharmacology*. 41:2723-2732.
11. Kim MT, Soussou W, Gholmieh G, Ahuja A, Tanguay A, Berger TW, Brinton RD (2006): 17 $\beta$ -Estradiol potentiates field excitatory postsynaptic potentials within each subfield of the hippocampus with greatest potentiation of the associational/commissural afferents of CA3. *Neuroscience*. 141:391-406.
12. Kramár EA, Chen LY, Brandon NJ, Rex CS, Liu F, Gall CM, Lynch G (2009): Cytoskeletal changes underlie estrogen's acute effects on synaptic transmission and plasticity. *Journal of Neuroscience*. 29:12982-12993.
13. Kumar A, Bean LA, Rani A, Jackson T, Foster TC (2015): Contribution of estrogen receptor subtypes, ER $\alpha$ , ER $\beta$ , and GPER1 in rapid estradiol-mediated enhancement of hippocampal synaptic transmission in mice. *Hippocampus*. 25:1556-1566.
14. Lu Y, Sareddy GR, Wang J, Wang R, Li Y, Dong Y, et al. (2019): Neuron-Derived Estrogen Regulates Synaptic Plasticity and Memory. *The Journal of Neuroscience*. 39:2792-2809.

15. Murphy DD, Cole NB, Greenberger V, Segal M (1998): Estradiol increases dendritic spine density by reducing GABA neurotransmission in hippocampal neurons. *J Neurosci.* 18:2550-2559.
16. Oberlander JG, Woolley CS (2017): 17 $\beta$ -Estradiol Acutely Potentiates Glutamatergic Synaptic Transmission in the Hippocampus through Distinct Mechanisms in Males and Females. *The Journal of Neuroscience.* 37:12314-12327.
17. Potier M, Georges F, Brayda-Bruno L, Ladépêche L, Lamothe V, Al Abed AS, et al. (2016): Temporal Memory and Its Enhancement by Estradiol Requires Surface Dynamics of Hippocampal CA1 N-Methyl-D-Aspartate Receptors. *Biol Psychiatry.* 79:735-745.
18. Sato K, Akaishi T, Matsuki N, Ohno Y, Nakazawa K (2007):  $\beta$ -Estradiol induces synaptogenesis in the hippocampus by enhancing brain-derived neurotrophic factor release from dentate gyrus granule cells. *Brain Research.* 1150:108-120.
19. Srivastava DP, Woolfrey KM, Jones KA, Shum CY, Lash LL, Swanson GT, Penzes P (2008): Rapid enhancement of two-step wiring plasticity by estrogen and NMDA receptor activity. *Proc Natl Acad Sci U S A.* 105:14650-14655.
20. Wong M, Moss RL (1992): Long-term and short-term electrophysiological effects of estrogen on the synaptic properties of hippocampal CA1 neurons. *J Neurosci.* 12:3217-3225.
21. Zadran S, Qin Q, Bi X, Zadran H, Kim Y, Foy MR, et al. (2009): 17- $\beta$ -Estradiol increases neuronal excitability through MAP kinase-induced calpain activation. *Proceedings of the National Academy of Sciences.* 106:21936-21941.
22. Zhimin S, Hongyan Y, Elizabeth MP, Jill BB (2019): Estradiol-Induced Potentiation of Dopamine Release in Dorsal Striatum Following Amphetamine Administration Requires Estradiol Receptors and mGlu5. *eneuro.* 6:ENEURO.0446-0418.2019.
23. Dieni CV, Ferraresi A, Sullivan JA, Grassi S, Pettorossi VE, Panichi R (2018): Acute inhibition of estradiol synthesis impacts vestibulo-ocular reflex adaptation and cerebellar long-term potentiation in male rats. *Brain Structure and Function.* 223:837-850.
24. Roland AB, Lepu Z, Ricardo V, Nicola B, Alexander K, Christine EG, et al. (2017): Sex-Dependent Regulation of Aromatase-Mediated Synaptic Plasticity in the Basolateral Amygdala. *The Journal of Neuroscience.* 37:1532.
25. Leranth C, Hajszan T, J. MacLusky N (2004): Androgens Increase Spine Synapse Density in the CA1 Hippocampal Subfield of Ovariectomized Female Rats. *The Journal of Neuroscience.* 24:495.
26. Sharrow KM, Kumar A, Foster TC (2002): Calcineurin as a potential contributor in estradiol regulation of hippocampal synaptic function. *Neuroscience.* 113:89-97.
27. Scarduzio M, Panichi R, Pettorossi VE, Grassi S (2013): Synaptic Long-Term Potentiation and Depression in the Rat Medial Vestibular Nuclei Depend on Neural Activation of Estrogenic and Androgenic Signals. *PLOS ONE.* 8:e80792.
28. Tozzi A, Durante V, Manca P, Di Mauro M, Blasi J, Grassi S, et al. (2019): Bidirectional Synaptic Plasticity Is Driven by Sex Neurosteroids Targeting Estrogen and Androgen Receptors in Hippocampal CA1 Pyramidal Neurons. *Frontiers in Cellular Neuroscience.* 13.
29. Birey F, Andersen J, Makinson CD, Islam S, Wei W, Huber N, et al. (2017): Assembly of functionally integrated human forebrain spheroids. *Nature.* 545:54-59.

30. Sakaguchi H, Kadoshima T, Soen M, Narii N, Ishida Y, Ohgushi M, et al. (2015): Generation of functional hippocampal neurons from self-organizing human embryonic stem cell-derived dorsomedial telencephalic tissue. *Nature Communications*. 6:8896.
31. Muguruma K, Nishiyama A, Kawakami H, Hashimoto K, Sasai Y (2015): Self-Organization of Polarized Cerebellar Tissue in 3D Culture of Human Pluripotent Stem Cells. *Cell Reports*. 10:537-550.
